# Supplementary material for: Novel Highly Efficient Green and Reusable Cu(II)/Chitosan-Based Catalysts for the Sonogashira, Buchwald, Aldol, and Dipolar Cycloaddition Reactions
Source: MDPI journal article supplement (doi:10.3390/catal13010203), 2023-01-15
Supplement: s1 [file s1]

## Supplementary Materials

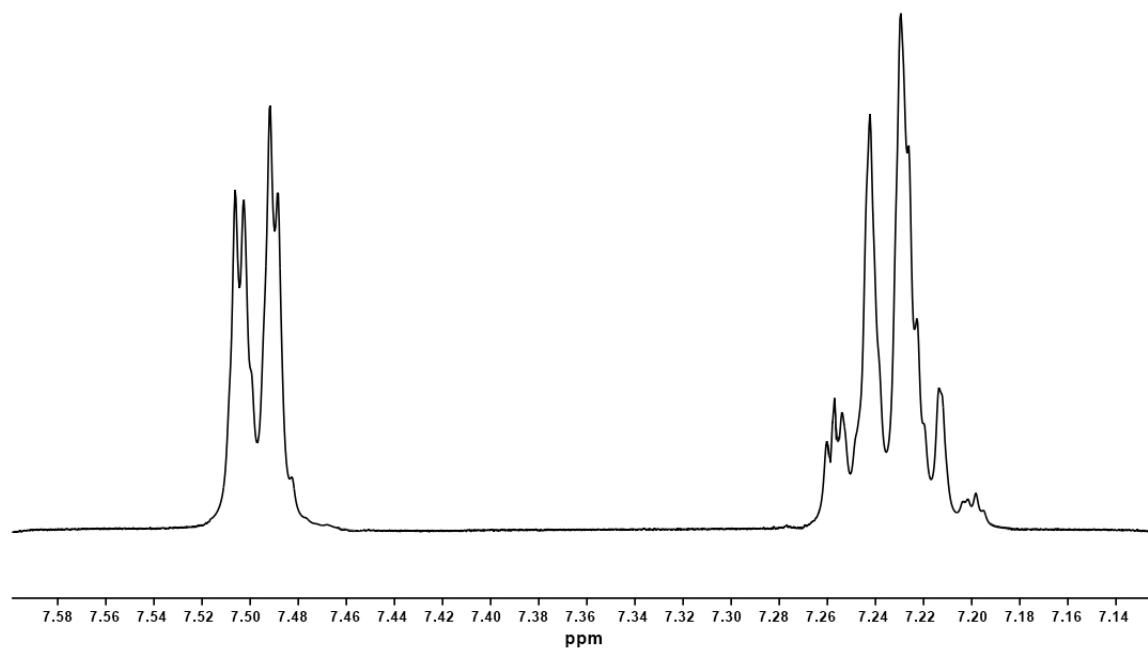

**Figure S1.**  $^1\text{H}$  NMR spectrum of the product of the model Sonogashira reaction

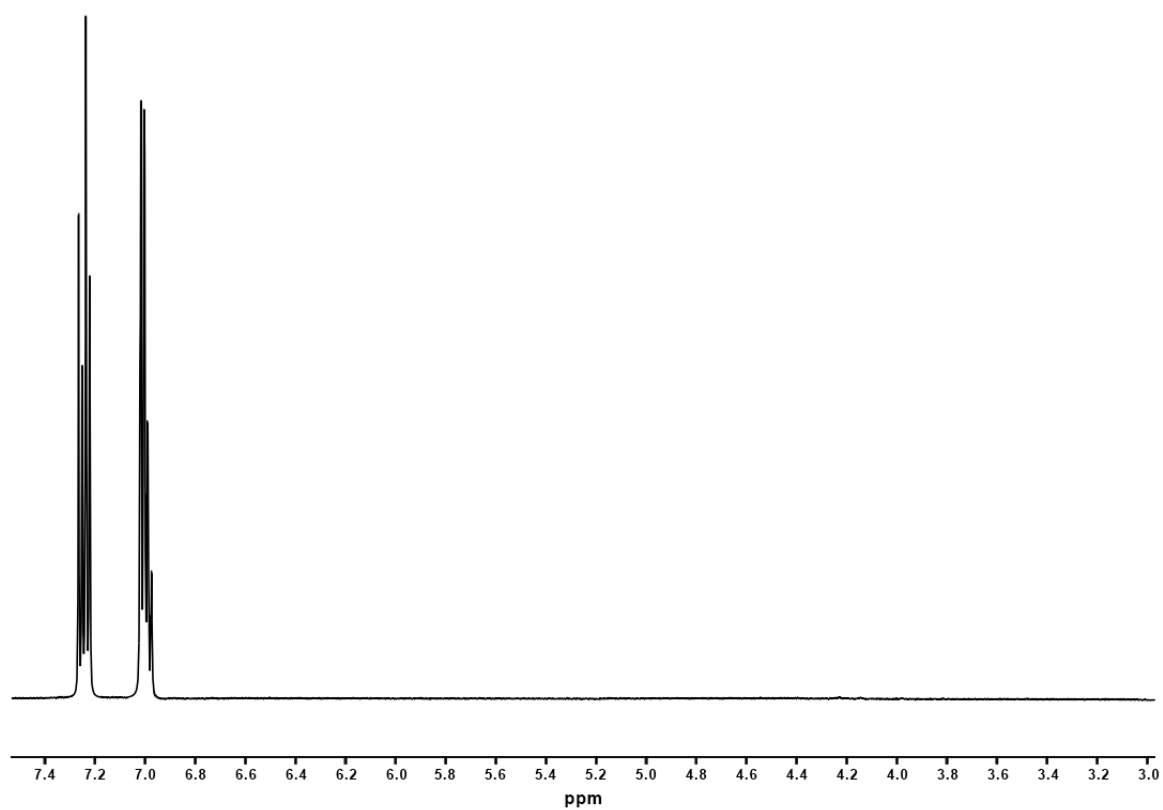

**Figure S2.**  $^1\text{H}$  NMR spectrum of the product of the Buchwald-Hartwig and Chan-Lam reactions

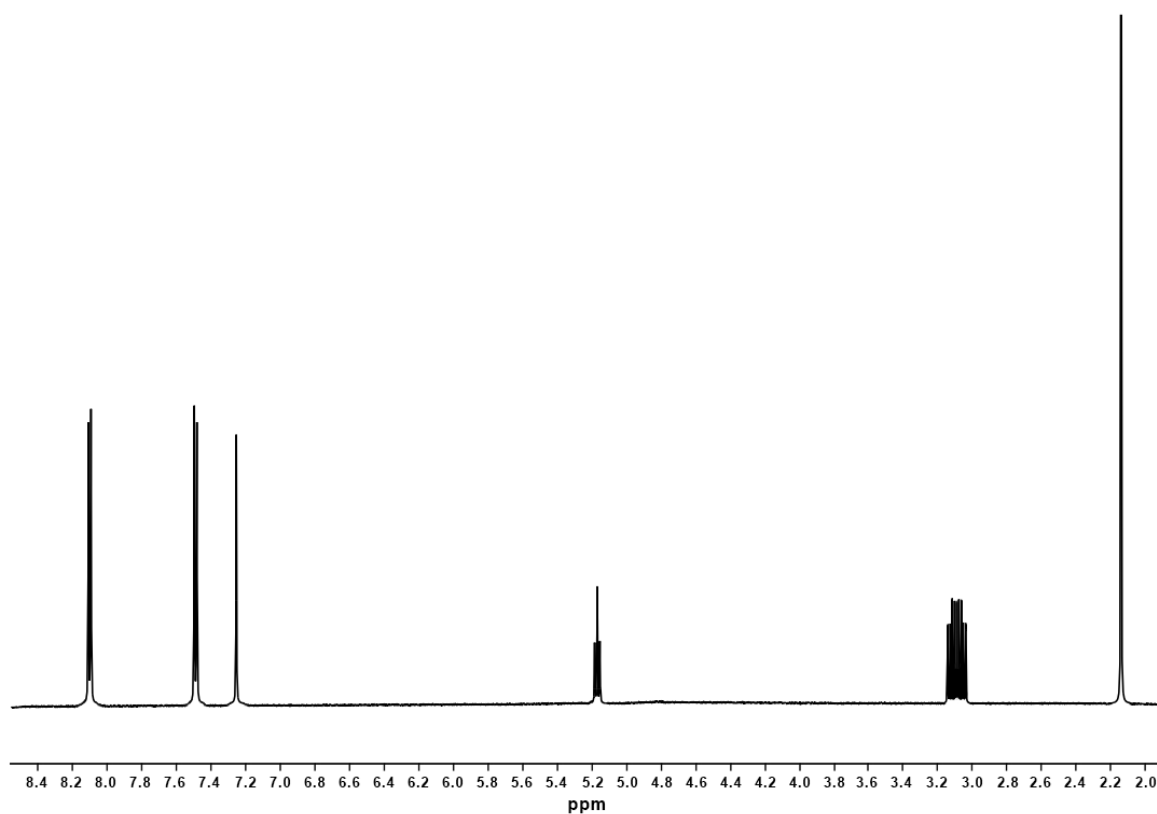

**Figure S3.**  $^1\text{H}$  NMR spectrum of the aldol reaction

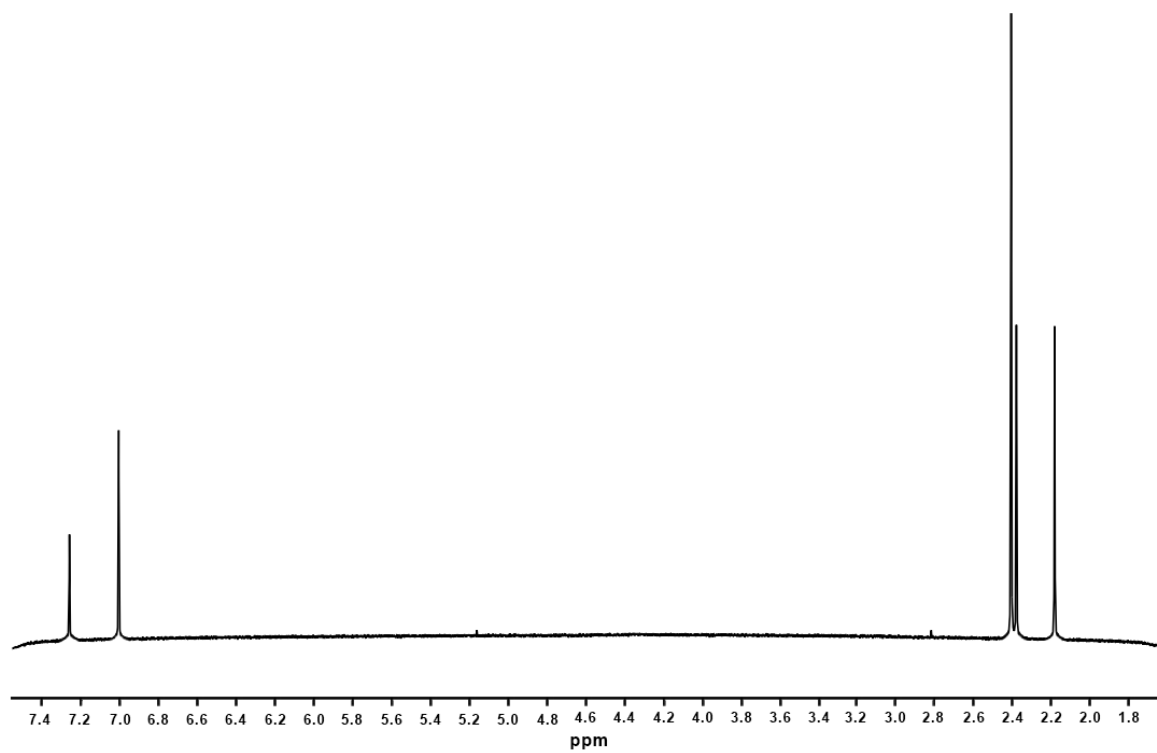

**Figure S4.**  $^1\text{H}$  NMR spectrum of the 1,3-dipolar cycloaddition of nitrile oxides to nitriles
